# Supplementary material for: Study on soil-water characteristic curves in the profiles of collapsing walls of typical granite Benggang in southeast China
Source: PeerJ. 2022 Jun 1;10:e13526. doi: 10.7717/peerj.13526 (PMC9166684; doi:10.7717/peerj.13526)
Supplement: Supplemental Information 1 [file peerj-10-13526-s001.xlsx]

## Sheet: Sheet1
	A1	A2	A3	A4	A5	A6	A7	A8	A9	A10
5	0.373265	0.390048	0.368371	0.371201	0.310354	0.348258	0.319677	0.365423	0.33003	0.331327
10	0.357785	0.375332	0.350165	0.353928	0.298602	0.323881	0.303765	0.346349	0.293391	0.295776
20	0.345826	0.364093	0.338022	0.339019	0.258589	0.289027	0.263031	0.318343	0.27191	0.270806
40	0.334062	0.355113	0.328133	0.323862	0.234972	0.268473	0.241518	0.285885	0.244123	0.243977
80	0.319015	0.343228	0.313109	0.297075	0.207375	0.243928	0.217788	0.252258	0.218641	0.216956
150	0.30611	0.33176	0.300184	0.276187	0.184155	0.222927	0.195952	0.22527	0.198529	0.195467
300	0.288912	0.315559	0.282119	0.249724	0.155445	0.192396	0.164059	0.189154	0.171268	0.171586
600	0.271346	0.299591	0.264771	0.228067	0.1359	0.165286	0.139293	0.158453	0.152099	0.149462
1200	0.264135	0.290865	0.258002	0.21996	0.131527	0.159217	0.133569	0.148706	0.14358	0.138662
1500	0.260285	0.288031	0.254195	0.215916	0.126947	0.155721	0.129874	0.139279	0.135261	0.130737
	B1	B2	B3	B4	B5	B6	B7	B8
5	0.301857	0.427077	0.324334	0.307281	0.448042	0.440593	0.422554	0.475157
10	0.286706	0.404833	0.310437	0.296116	0.423947	0.423895	0.403747	0.43938
20	0.255631	0.367599	0.284909	0.270162	0.366087	0.385092	0.358802	0.364847
40	0.238586	0.348184	0.272857	0.258714	0.336566	0.363354	0.338841	0.323322
80	0.223447	0.33117	0.262155	0.248194	0.306427	0.341573	0.316399	0.280956
150	0.210842	0.318006	0.255039	0.24087	0.27259	0.317896	0.288511	0.230325
300	0.197392	0.302455	0.245823	0.231485	0.224557	0.276908	0.247745	0.167848
600	0.184715	0.287706	0.236136	0.222525	0.182343	0.221407	0.194038	0.114273
1200	0.179155	0.281269	0.231329	0.219398	0.173263	0.203072	0.167729	0.0936214
1500	0.179855	0.282257	0.232274	0.219255	0.172345	0.197881	0.162304	0.0935248
